# Supplementary material for: Prevalence of Psychological Impacts on Healthcare Providers during COVID-19 Pandemic in Asia
Source: MDPI journal article supplement (doi:10.3390/ijerph18179157), 2021-08-30
Supplement: s1 [file s1]

Table SI: JBI Quality Assessment Tool for prevalence studies

| Criteria<br>(Yes/No/Unclear/<br>NA) | Appropriate<br>sample frame | Appropriate<br>sampling<br>participant | Adequate sample<br>size | Description of<br>subjects and the<br>setting | Provide sample<br>size justification,<br>power description,<br>or variance and<br>effect estimates | Valid method | Condition<br>measured in a<br>standard, reliable<br>way for all | Appropriate<br>statistical analysis | Adequate response<br>rate | Total quality score | Risk of Bias |
|-------------------------------------|-----------------------------|----------------------------------------|-------------------------|-----------------------------------------------|----------------------------------------------------------------------------------------------------|--------------|-----------------------------------------------------------------|-------------------------------------|---------------------------|---------------------|--------------|
| Alateeq et al, 2020                 | 1                           | 1                                      | 1                       | 1                                             | 1                                                                                                  | 1            | 1                                                               | 1                                   | 1                         | 9                   | low          |
| Alenazi et al, 2020                 | 1                           | 1                                      | 1                       | 1                                             | 1                                                                                                  | 1            | 1                                                               | 1                                   | 1                         | 9                   | low          |
| Almater et al., 2020                | 1                           | 1                                      | 0                       | 1                                             | 0                                                                                                  | 1            | 1                                                               | 1                                   | 0                         | 6                   | moderate     |
| Alrubaiee et al., 2020              | 0                           | 0                                      | 0                       | 1                                             | 0                                                                                                  | 1            | 1                                                               | 1                                   | 0                         | 4                   | high         |
| Alsairafi et al., 2021              | 1                           | 1                                      | 1                       | 1                                             | 1                                                                                                  | 1            | 1                                                               | 1                                   | 1                         | 9                   | low          |
| Alshekaili et al., 2020             | 1                           | 1                                      | 1                       | 1                                             | 1                                                                                                  | 1            | 1                                                               | 1                                   | 1                         | 9                   | low          |
| Amin et al., 2020                   | 1                           | 0                                      | 1                       | 1                                             | 1                                                                                                  | 1            | 1                                                               | 1                                   | 1                         | 8                   | low          |
| An et al., 2021                     | 0                           | 0                                      | 0                       | 1                                             | 0                                                                                                  | 1            | 1                                                               | 1                                   | 0                         | 4                   | high         |
| Arafa et al., 2021                  | 1                           | 1                                      | 0                       | 1                                             | 0                                                                                                  | 1            | 1                                                               | 1                                   | 0                         | 6                   | moderate     |
| Arshad & islam, 2020                | 1                           | 1                                      | 0                       | 1                                             | 0                                                                                                  | 1            | 1                                                               | 1                                   | 0                         | 6                   | moderate     |
| Awano et al., 2020                  | 1                           | 1                                      | 0                       | 1                                             | 0                                                                                                  | 1            | 1                                                               | 1                                   | 0                         | 6                   | moderate     |
| Balay et al., 2020                  | 1                           | 1                                      | 1                       | 1                                             | 1                                                                                                  | 1            | 1                                                               | 1                                   | 1                         | 9                   | low          |
| Barua et al., 2020                  | 0                           | 1                                      | 1                       | 1                                             | 0                                                                                                  | 1            | 1                                                               | 1                                   | 1                         | 7                   | low          |
| Cai q et al., 2020                  | 0                           | 1                                      | 0                       | 1                                             | 0                                                                                                  | 1            | 1                                                               | 1                                   | 0                         | 5                   | moderate     |
| Cai z et al., 2020                  | 1                           | 1                                      | 0                       | 1                                             | 0                                                                                                  | 1            | 1                                                               | 1                                   | 0                         | 6                   | moderate     |
| Chen et al, 2021                    | 0                           | 1                                      | 0                       | 0                                             | 0                                                                                                  | 1            | 1                                                               | 1                                   | 0                         | 4                   | high         |
| Chew et al., 2020                   | 1                           | 0                                      | 0                       | 1                                             | 0                                                                                                  | 1            | 1                                                               | 1                                   | 0                         | 5                   | moderate     |
| Chew n et al., 2020                 | 1                           | 0                                      | 0                       | 1                                             | 0                                                                                                  | 1            | 1                                                               | 1                                   | 0                         | 5                   | moderate     |
| Das et al, 2002                     | 1                           | 1                                      | 0                       | 1                                             | 0                                                                                                  | 1            | 1                                                               | 1                                   | 0                         | 6                   | moderate     |
| Guo et al., 2021                    | 1                           | 1                                      | 0                       | 1                                             | 0                                                                                                  | 1            | 1                                                               | 1                                   | 0                         | 6                   | moderate     |
| Gupta et al., 2020                  | 1                           | 1                                      | 0                       | 1                                             | 0                                                                                                  | 1            | 1                                                               | 1                                   | 0                         | 6                   | moderate     |

|                                   |   |   |   |   |   |   |   |   |   |   |          |
|-----------------------------------|---|---|---|---|---|---|---|---|---|---|----------|
| Han et al., 2020                  | 1 | 1 | 0 | 1 | 0 | 1 | 1 | 1 | 0 | 6 | moderate |
| Hassannia et al, 2021             | 0 | 0 | 0 | 1 | 0 | 1 | 1 | 1 | 0 | 4 | high     |
| Hong s et al., 2021               | 1 | 1 | 0 | 1 | 0 | 1 | 1 | 1 | 0 | 6 | moderate |
| Huang l et al., 2020              | 1 | 1 | 1 | 1 | 1 | 1 | 1 | 1 | 1 | 9 | low      |
| Huang y et al., 2021              | 0 | 0 | 0 | 0 | 0 | 1 | 1 | 1 | 0 | 3 | high     |
| Kafle et al., 2021                | 0 | 0 | 1 | 1 | 1 | 1 | 1 | 1 | 1 | 7 | low      |
| Khanal et al., 2020               | 1 | 1 | 0 | 1 | 0 | 1 | 1 | 1 | 0 | 6 | moderate |
| Khanna et al., 2020               | 1 | 0 | 0 | 1 | 0 | 1 | 1 | 1 | 0 | 5 | moderate |
| Khatun et al., 2002               | 1 | 1 | 0 | 1 | 0 | 1 | 1 | 1 | 0 | 6 | moderate |
| Koksal et al., 2020               | 0 | 0 | 1 | 1 | 1 | 1 | 1 | 1 | 1 | 7 | low      |
| Kumar et al., 2021                | 1 | 0 | 0 | 1 | 0 | 1 | 1 | 1 | 0 | 5 | moderate |
| Li j et al., 2021                 | 1 | 1 | 1 | 1 | 0 | 1 | 1 | 1 | 1 | 8 | low      |
| Li r et al., 2020                 | 1 | 1 | 0 | 1 | 0 | 1 | 1 | 1 | 0 | 6 | moderate |
| Li x et al., 2020                 | 1 | 0 | 0 | 1 | 0 | 1 | 1 | 1 | 0 | 5 | moderate |
| Liang et al., 2002                | 0 | 0 | 0 | 1 | 0 | 1 | 1 | 1 | 0 | 4 | high     |
| Liu c et al., 2020                | 1 | 0 | 0 | 1 | 0 | 1 | 1 | 1 | 0 | 5 | moderate |
| Liu y et al., 2021                | 1 | 1 | 0 | 1 | 0 | 1 | 1 | 1 | 0 | 6 | moderate |
| Lu peixin et al., 2020            | 1 | 0 | 0 | 1 | 0 | 1 | 1 | 1 | 0 | 5 | moderate |
| Lu w et al., 2020                 | 1 | 0 | 0 | 1 | 0 | 1 | 1 | 1 | 0 | 5 | moderate |
| Moayed et al., 2021               | 1 | 1 | 1 | 1 | 1 | 1 | 1 | 1 | 1 | 9 | low      |
| Mohammadian khonsari et al., 2021 | 1 | 1 | 1 | 1 | 1 | 1 | 1 | 1 | 1 | 9 | low      |
| Mohd fauzi et al., 2020           | 1 | 0 | 1 | 1 | 1 | 1 | 1 | 1 | 1 | 8 | low      |
| Naser et al., 2020                | 0 | 1 | 1 | 1 | 1 | 1 | 1 | 1 | 1 | 8 | low      |
| Ning x et al., 2020               | 1 | 1 | 0 | 1 | 0 | 1 | 1 | 1 | 0 | 6 | moderate |
| Pan et al., 2020                  | 1 | 1 | 0 | 1 | 0 | 1 | 1 | 1 | 0 | 6 | moderate |
| Pandey et al., 2021               | 1 | 1 | 0 | 1 | 0 | 1 | 1 | 1 | 0 | 6 | moderate |
| Pang et al., 2021                 | 1 | 1 | 0 | 1 | 0 | 1 | 1 | 1 | 0 | 6 | moderate |
| Park c et al., 2020               | 1 | 0 | 0 | 1 | 0 | 1 | 1 | 1 | 0 | 5 | moderate |
| Park s et al., 2020               | 1 | 0 | 0 | 1 | 0 | 1 | 1 | 1 | 0 | 5 | moderate |

|                            |   |   |   |   |   |   |   |   |   |   |          |
|----------------------------|---|---|---|---|---|---|---|---|---|---|----------|
| Parthasarathy et al., 2021 | 1 | 0 | 0 | 1 | 0 | 1 | 1 | 1 | 0 | 5 | moderate |
| Perera et al., 2021        | 1 | 0 | 0 | 1 | 0 | 1 | 1 | 1 | 0 | 5 | moderate |
| Saeed et al., 2021         | 0 | 0 | 0 | 1 | 0 | 1 | 1 | 1 | 0 | 4 | high     |
| Sahin et al., 2020         | 0 | 0 | 1 | 0 | 1 | 1 | 1 | 1 | 1 | 6 | moderate |
| Si et al., 2020            | 1 | 0 | 0 | 1 | 0 | 1 | 1 | 1 | 0 | 5 | moderate |
| Sim et al., 2021           | 1 | 1 | 1 | 1 | 1 | 1 | 1 | 1 | 1 | 9 | low      |
| Song et al., 2020          | 1 | 1 | 0 | 1 | 0 | 1 | 1 | 1 | 0 | 6 | moderate |
| Sunjaya et al., 2021       | 0 | 1 | 0 | 1 | 0 | 1 | 1 | 1 | 0 | 5 | moderate |
| Suryavanshi et al., 2020   | 1 | 1 | 0 | 1 | 0 | 1 | 1 | 1 | 0 | 6 | moderate |
| Tan et al., 2020           | 1 | 0 | 0 | 1 | 0 | 1 | 1 | 1 | 0 | 5 | moderate |
| Temsah et al., 2020        | 1 | 0 | 0 | 1 | 0 | 1 | 1 | 1 | 0 | 5 | moderate |
| Trans et al., 2020         | 1 | 1 | 0 | 1 | 0 | 1 | 1 | 1 | 0 | 6 | moderate |
| Tu et al., 2020            | 1 | 1 | 0 | 1 | 0 | 1 | 1 | 1 | 0 | 6 | moderate |
| Wang l et al., 2020        | 1 | 0 | 0 | 1 | 0 | 1 | 1 | 1 | 0 | 5 | moderate |
| Wang m et al., 2021        | 0 | 0 | 0 | 1 | 0 | 1 | 1 | 1 | 0 | 4 | high     |
| Wang y et al., 2020        | 1 | 0 | 1 | 1 | 1 | 1 | 1 | 1 | 1 | 8 | low      |
| Xia et al., 2021           | 0 | 0 | 0 | 1 | 0 | 1 | 1 | 1 | 0 | 4 | high     |
| Xiao et al., 2020          | 1 | 0 | 0 | 0 | 0 | 1 | 1 | 1 | 0 | 4 | high     |
| Xiaoming, 2020             | 1 | 1 | 0 | 1 | 0 | 1 | 1 | 1 | 0 | 6 | moderate |
| Xing et al., 2020          | 1 | 1 | 0 | 1 | 0 | 1 | 1 | 1 | 0 | 6 | moderate |
| Xu et al., 2021            | 1 | 1 | 0 | 1 | 0 | 1 | 1 | 1 | 0 | 6 | moderate |
| Yang s et al., 2020        | 1 | 1 | 0 | 1 | 0 | 1 | 1 | 1 | 0 | 6 | moderate |
| Yildirim et al., 2021      | 1 | 1 | 0 | 1 | 0 | 1 | 1 | 1 | 0 | 6 | moderate |
| Yilmaz et al., 2020        | 1 | 0 | 0 | 1 | 0 | 1 | 1 | 1 | 0 | 5 | moderate |
| Yoruk & guler, 2021        | 0 | 0 | 1 | 0 | 1 | 1 | 1 | 1 | 1 | 6 | moderate |
| Zhan et al., 2020          | 1 | 1 | 1 | 1 | 1 | 1 | 1 | 1 | 1 | 9 | low      |
| Zhang et al., 2020         | 1 | 0 | 0 | 1 | 0 | 1 | 1 | 1 | 0 | 5 | moderate |
| Zhao et al., 2020          | 0 | 0 | 0 | 1 | 0 | 1 | 1 | 1 | 0 | 4 | high     |

|                    |   |   |   |   |   |   |   |   |   |   |          |
|--------------------|---|---|---|---|---|---|---|---|---|---|----------|
| Zheng et al., 2021 | 1 | 1 | 0 | 1 | 0 | 1 | 1 | 1 | 0 | 6 | moderate |
| Zhu et al., 2020   | 1 | 1 | 0 | 1 | 0 | 1 | 1 | 1 | 0 | 6 | moderate |
