# Supplementary material for: Prevalence of Psychological Impacts on Healthcare Providers during COVID-19 Pandemic in Asia
Source: MDPI journal article supplement (doi:10.3390/ijerph18179157), 2021-08-30
Supplement: s1 [file s1]

Table S2: Studies characteristics

| Author             | Year | Country                                        | Region                               | Tool                                                                                                                 |
|--------------------|------|------------------------------------------------|--------------------------------------|----------------------------------------------------------------------------------------------------------------------|
| AlAteeq et. al.    | 2020 | Saudi Arabia                                   | Western Asia                         | PHQ-9, GAD-7                                                                                                         |
| Alenazi et. al.    | 2020 | Saudi Arabia                                   | Western Asia                         | The one-item question Likert scale for anxiety                                                                       |
| Almater et. al.    | 2020 | Saudi Arabia                                   | Western Asia                         | PHQ-9, GAD-7, ISI, PSS-10                                                                                            |
| Alrubaiee et. al.  | 2020 | Yemen                                          | Western Asia                         | The respondents' anxiety (17-items)                                                                                  |
| Alsairafi et. al.  | 2021 | Kuwait                                         | Western Asia                         | PHQ-9, GAD-7                                                                                                         |
| Alshekaili et. al. | 2020 | Oman                                           | Western Asia                         | DASS-21, ISI                                                                                                         |
| Amin et. al.       | 2020 | Pakistan                                       | Southern Asia                        | SRQ-20                                                                                                               |
| An et. al.         | 2021 | China                                          | Eastern Asia                         | The Chinese version of CPSS, 20-item SDS. 20-item SAS,                                                               |
| Arafa et. al.      | 2021 | Saudi Arabia                                   | Western Asia                         | DASS-21                                                                                                              |
| Arshad & Islam     | 2020 | Pakistan                                       | Southern Asia                        | GAD-7                                                                                                                |
| Awano et. al.      | 2020 | Japan                                          | Eastern Asia                         | The Japanese versions of the GAD-7, CES-D                                                                            |
| Balay et. al.      | 2020 | Saudi Arabia                                   | Western Asia                         | DASS-21                                                                                                              |
| Barua et. al.      | 2020 | Bangladesh                                     | Southern Asia                        | PHQ-4                                                                                                                |
| Cai Q et. al.      | 2020 | China                                          | Eastern Asia                         | BAI, ISI, PHQ-9                                                                                                      |
| Cai Z et. al.      | 2020 | China                                          | Eastern Asia                         | PHQ-9, GAD-7, ISI, IESR                                                                                              |
| Chen et. al.       | 2021 | China                                          | Eastern Asia                         | GAD-7, PHQ-9                                                                                                         |
| Chew et. al.       | 2020 | India, Indonesia, Singapore, Malaysia, Vietnam | Southern Asia and South-Eastern Asia | DASS-21, IESR                                                                                                        |
| Chew N et. al.     | 2020 | Singapore, India                               | Southern Asia and South-Eastern Asia | DASS-21, IESR                                                                                                        |
| Das et. al.        | 2020 | India                                          | Southern Asia                        | PHQ-9, PSS-10                                                                                                        |
| Guo et. al.        | 2021 | China                                          | Eastern Asia                         | GAD-7, PSQI, PHQ-9, PCL-C                                                                                            |
| Gupta et. al.      | 2020 | India                                          | Southern Asia                        | GAD-7, single-item sleep quality scale                                                                               |
| Han et. al.        | 2020 | China                                          | Eastern Asia                         | SAS, SDS                                                                                                             |
| Hassannia et. al.  | 2021 | Iran                                           | Southern Asia                        | HADS                                                                                                                 |
| Hong et. al.       | 2021 | China                                          | Eastern Asia                         | A job-related stress severity scale developed for frontline health care workers in severe acute respiratory syndrome |

|                       |      |              |                    |                                       |
|-----------------------|------|--------------|--------------------|---------------------------------------|
|                       |      |              |                    | (SARS) outbreak, PHQ-9, GAD-7         |
| Huang L et. al.       | 2020 | China        | Eastern Asia       | SAS                                   |
| Huang Y et. al.       | 2021 | China        | Eastern Asia       | Chinese version of GAD-7, CES-D, PSQI |
| Kafle et. al.         | 2021 | Nepal        | Southern Asia      | CPDI                                  |
| Khanal et. al.        | 2020 | Nepal        | Southern Asia      | HADS, ISI                             |
| Khanna et. al.        | 2020 | India        | Southern Asia      | PHQ-9                                 |
| Khatun et. al.        | 2021 | Bangladesh   | Southern Asia      | GAD-7, PHQ-9                          |
| Koksal et. al.        | 2020 | Turkey       | Western Asia       | HADS                                  |
| Kumar et. al.         | 2021 | Pakistan     | Southern Asia      | DASS-21                               |
| Li J et. al.          | 2021 | China        | Eastern Asia       | PHQ-9, GAD                            |
| Li R et. al.          | 2020 | China        | Eastern Asia       | HAMA                                  |
| Li X et. al.          | 2020 | China        | Eastern Asia       | IES-R, DASS-21                        |
| Liang et. al.         | 2020 | China        | Eastern Asia       | PHQ-9, GAD-7, ISI                     |
| Liu C et. al.         | 2020 | China        | Eastern Asia       | ZAS                                   |
| Liu Y et. al.         | 2021 | China        | Eastern Asia       | PSS-10, GAD-7, PHQ-9                  |
| Lu Peixin et. al.     | 2020 | China        | Eastern Asia       | PHQ-9, GAD-7, PCL-C                   |
| Lu W et. al.          | 2020 | China        | Eastern Asia       | HAMA, HAMD                            |
| Moayed et. al.        | 2021 | Iran         | Southern Asia      | DASS-21                               |
| Mohammadian           | 2021 | Iran         | Southern Asia      | PTSD-8, DASS-21                       |
| Khonsari et. al.      |      |              |                    |                                       |
| Mohd Fauzi et. al.    | 2020 | Malaysia     | South-Eastern Asia | DASS-21                               |
| Naser et. al.         | 2020 | Jordan       | Western Asia       | PHQ-9, GAD-7                          |
| Ning X et. al.        | 2020 | China        | Eastern Asia       | The Chinese version of SAS, SDS       |
| Pan et. al.           | 2020 | China        | Eastern Asia       | PHQ-9, GAD-7, PHQ-15                  |
| Pandey et. al.        | 2021 | Nepal        | Southern Asia      | DASS-21                               |
| Pang et. al.          | 2021 | China        | Eastern Asia       | GAD-7, PHQ-9                          |
| Park C et. al.        | 2020 | Korea        | Eastern Asia       | Korean version GAD                    |
| Park S et. al.        | 2020 | Korea        | Eastern Asia       | DASS-21                               |
| Parthasarathy et. al. | 2021 | India        | Southern Asia      | PHQ-4                                 |
| Perera et. al.        | 2021 | Sri Lanka    | Southern Asia      | GAD-7, CES-D-revised-10               |
| Saeed et. al.         | 2021 | South Asia   | Southern Asia      | SRQ-20                                |
| Sahin et. al.         | 2020 | Turkey       | Western Asia       | PHQ-9, GAD-7, ISI, IESR               |
| Si et. al.            | 2020 | China        | Eastern Asia       | IES-6, DASS-21, PCL-C                 |
| Sim et. al.           | 2021 | Malaysia     | South-Eastern Asia | DASS-21.                              |
| Song et. al.          | 2020 | China        | Eastern Asia       | PSSS, CES-D), PCL-5                   |
| Sunjaya et. al.       | 2021 | Indonesia    | South-Eastern Asia | CESD R-10, ZAS                        |
| Suryavanshi et. al.   | 2020 | India        | Southern Asia      | PHQ-9, GAD-7                          |
| Tan et. al.           | 2020 | Singapore    | South-Eastern Asia | HADS                                  |
| Temsah et. al.        | 2020 | Saudi Arabia | Western Asia       | GAD-7                                 |

|                  |      |         |                    |                                                                                           |
|------------------|------|---------|--------------------|-------------------------------------------------------------------------------------------|
| Tran et. al.     | 2020 | Vietnam | South-Eastern Asia | GAD-7, PHQ-9                                                                              |
| Tu et. al.       | 2020 | China   | Eastern Asia       | PSQI, GAD-7, PHQ-9                                                                        |
| Wang L et. al.   | 2020 | China   | Eastern Asia       | GAD-7, PHQ-9, PSQI, PSS-14                                                                |
| Wang M et. al.   | 2021 | China   | Eastern Asia       | PHQ-9, ISI, GAD-7                                                                         |
| Wang Y et. al.   | 2020 | China   | Eastern Asia       | PHQ-9, GAD-7, IESR                                                                        |
| Xia et. al.      | 2021 | China   | Eastern Asia       | ASI-3, PHQ-9                                                                              |
| Xiao et. al.     | 2020 | China   | Eastern Asia       | PSS-14, HADS.                                                                             |
| Xiaoming         | 2020 | China   | Eastern Asia       | PHQ-9, GAD-7, PHQ-15, and the score of stress and support scales.                         |
| Xing et. al.     | 2020 | China   | Eastern Asia       | The symptom checklist-90                                                                  |
| Xu et. al.       | 2021 | China   | Eastern Asia       | PHQ-9, reformulated a 14-item perceived stress scale and a 6-item perceived support scale |
| Yang S et. al.   | 2020 | Korea   | Eastern Asia       | GAD-7, PHQ-9                                                                              |
| Yildirim et. al. | 2021 | Turkey  | Western Asia       | DASS-21                                                                                   |
| Yilmaz et. al.   | 2020 | Turkey  | Western Asia       | BAI                                                                                       |
| Yoruk & Guler    | 2021 | Turkey  | Western Asia       | PSS, BAI                                                                                  |
| Zhan et. al.     | 2020 | China   | Eastern Asia       | GAD-7, PHQ-9, Chinese version PSS                                                         |
| Zhang et. al.    | 2020 | China   | Eastern Asia       | PCL-C, HADS, PHQ-15, ISI                                                                  |
| Zhao et. al.     | 2020 | China   | Eastern Asia       | The Chinese version of BAI                                                                |
| Zheng et. al.    | 2021 | China   | Eastern Asia       | SDS, SAS                                                                                  |
| Zhu et. al.      | 2020 | China   | Eastern Asia       | SAS                                                                                       |

ASI-3= Anxiety sensitivity index-3; BAI= The Beck anxiety inventory; CES-D= The center for epidemiologic studies depression scale; CESD R-10= The centre for epidemiological studies depression scale; CPDI= COVID-19 peritraumatic distress index; DASS-21= The depression, anxiety and stress scale; GAD-7= Seven-item generalized anxiety disorder 7; HADS= Hospital anxiety and depression scale; HAMA= The Hamilton rating scale for anxiety; HAMD= The Hamilton rating scale for depression; IES-6= Impact of events scale-6; IESR= Impact of events scale-revised; ISI= Insomnia severity index; PCL-5= PTSD checklist for dsm-5; PCL-C= PTSD checklist-civilian version; PHQ-4= Four-item Patient health questionnaire; PHQ-9= Nine-item Patient health questionnaire; PHQ-15= 15-item Patient health questionnaire; PSQI= Pittsburgh sleep quality index; PSS-10= 10-item perceived stress scale; PSS-14= 14-Perceived stress scale; PSSS= The perceived social support scale; PTSD-8= Post-traumatic stress disorder-8; SAS= Self-rating anxiety scale; SDS= Self-rating depression scale; SRQ-20= World health organization self-reporting questionnaire; ZAS= The Zung anxiety scale
